# Supplementary material for: An orthogonal spectrum sharing scheme for wireless sensor networks
Source: Springer Nature journal article supplement (doi:10.1186/1687-1499-2011-10), 2011-06-10
Supplement: 13638_2010_9_MOESM2_ESM.pdf [file 13638_2010_9_MOESM2_ESM.pdf]

SR

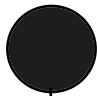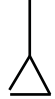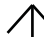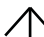

$\{h_5, d_5\}$

$\{h_6, d_6\}$

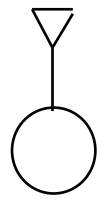

PT

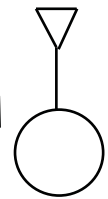

PR

$\{h_3, d_3\}$

$\{h_4, d_4\}$

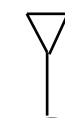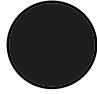

ST(1)

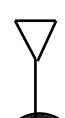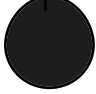

ST(2)
