# Supplementary material for: An orthogonal spectrum sharing scheme for wireless sensor networks
Source: Springer Nature journal article supplement (doi:10.1186/1687-1499-2011-10), 2011-06-10

**PT (0,0)**

**SR (0.25,0)**

**ST (0.5,0)**

**PR (1,0)**

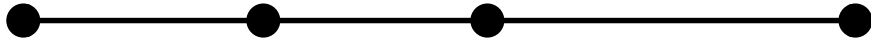

Supplement: 13638_2010_9_MOESM4_ESM.pdf [file 13638_2010_9_MOESM4_ESM.pdf]
