# Supplementary material for: An orthogonal spectrum sharing scheme for wireless sensor networks
Source: Springer Nature journal article supplement (doi:10.1186/1687-1499-2011-10), 2011-06-10

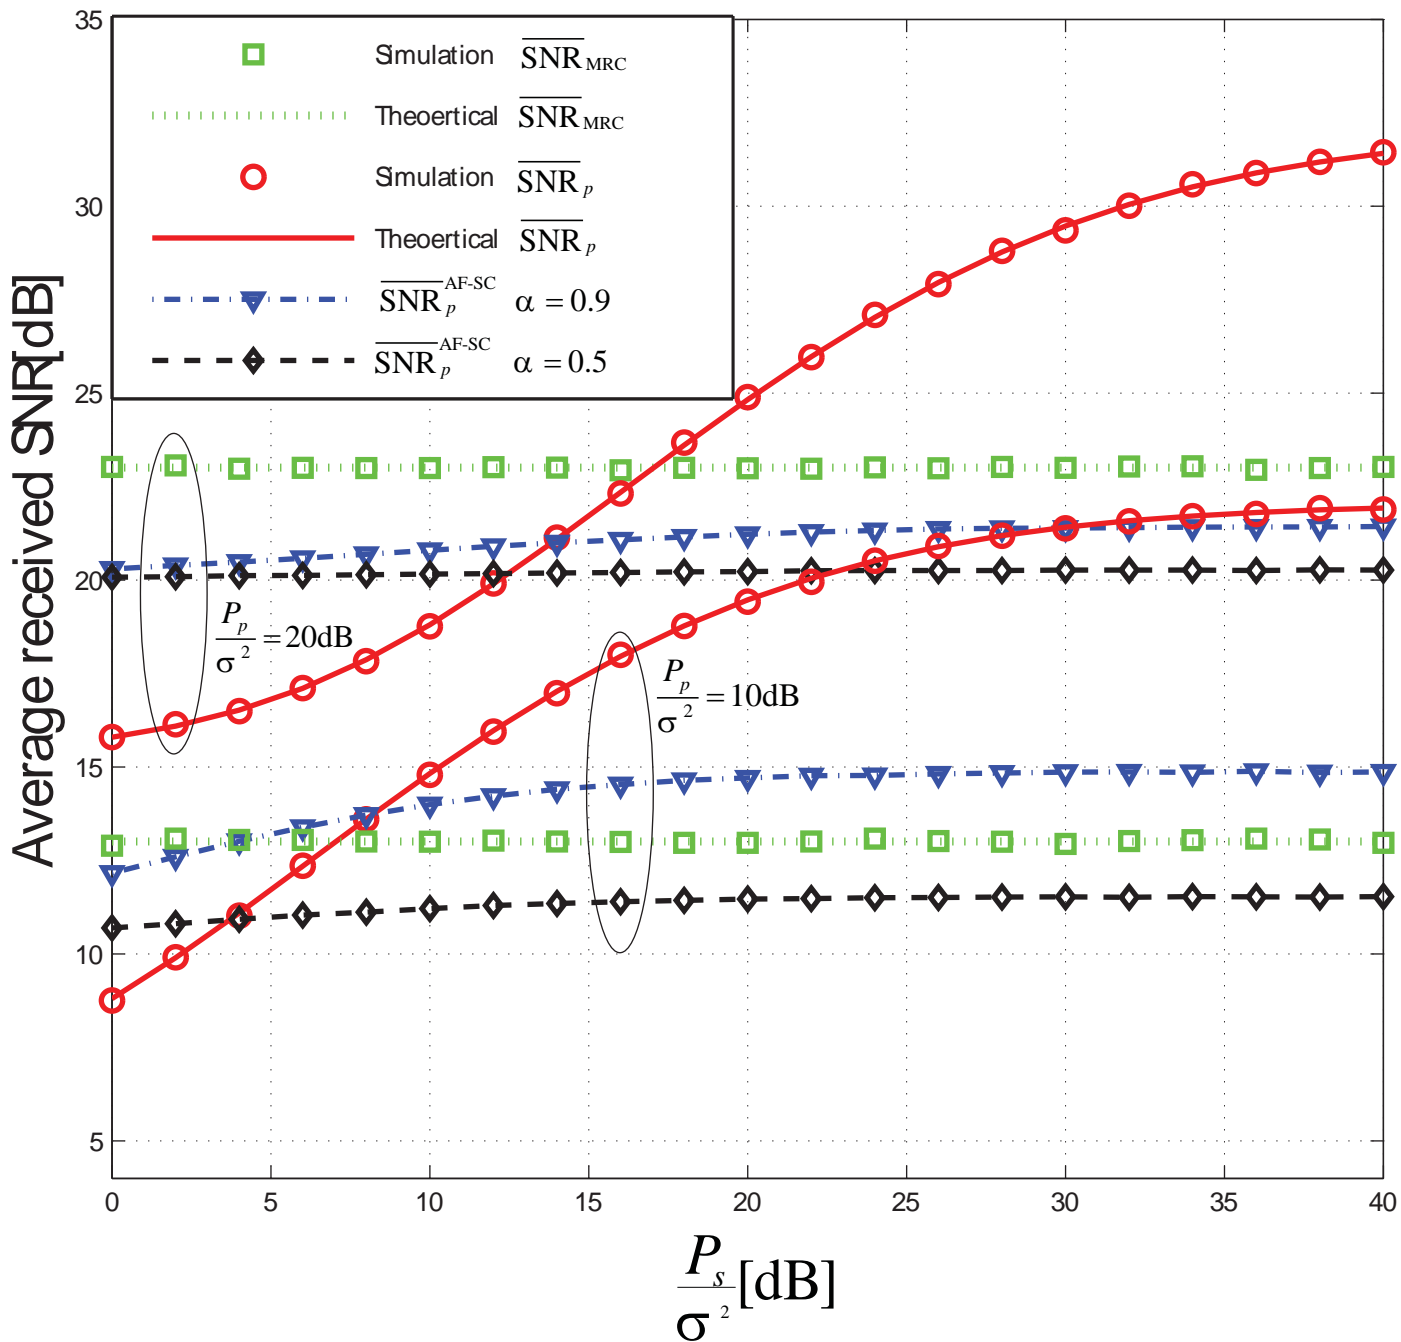

Supplement: 13638_2010_9_MOESM5_ESM.pdf [file 13638_2010_9_MOESM5_ESM.pdf]
